# Supplementary material for: Effective Harmonic Potentials: Insights into the Internal Cooperativity and Sequence-Specificity of Protein Dynamics
Source: PubMed Central journal article supplement (PMC3757084; doi:10.1371/journal.pcbi.1003209), 2013-08-29

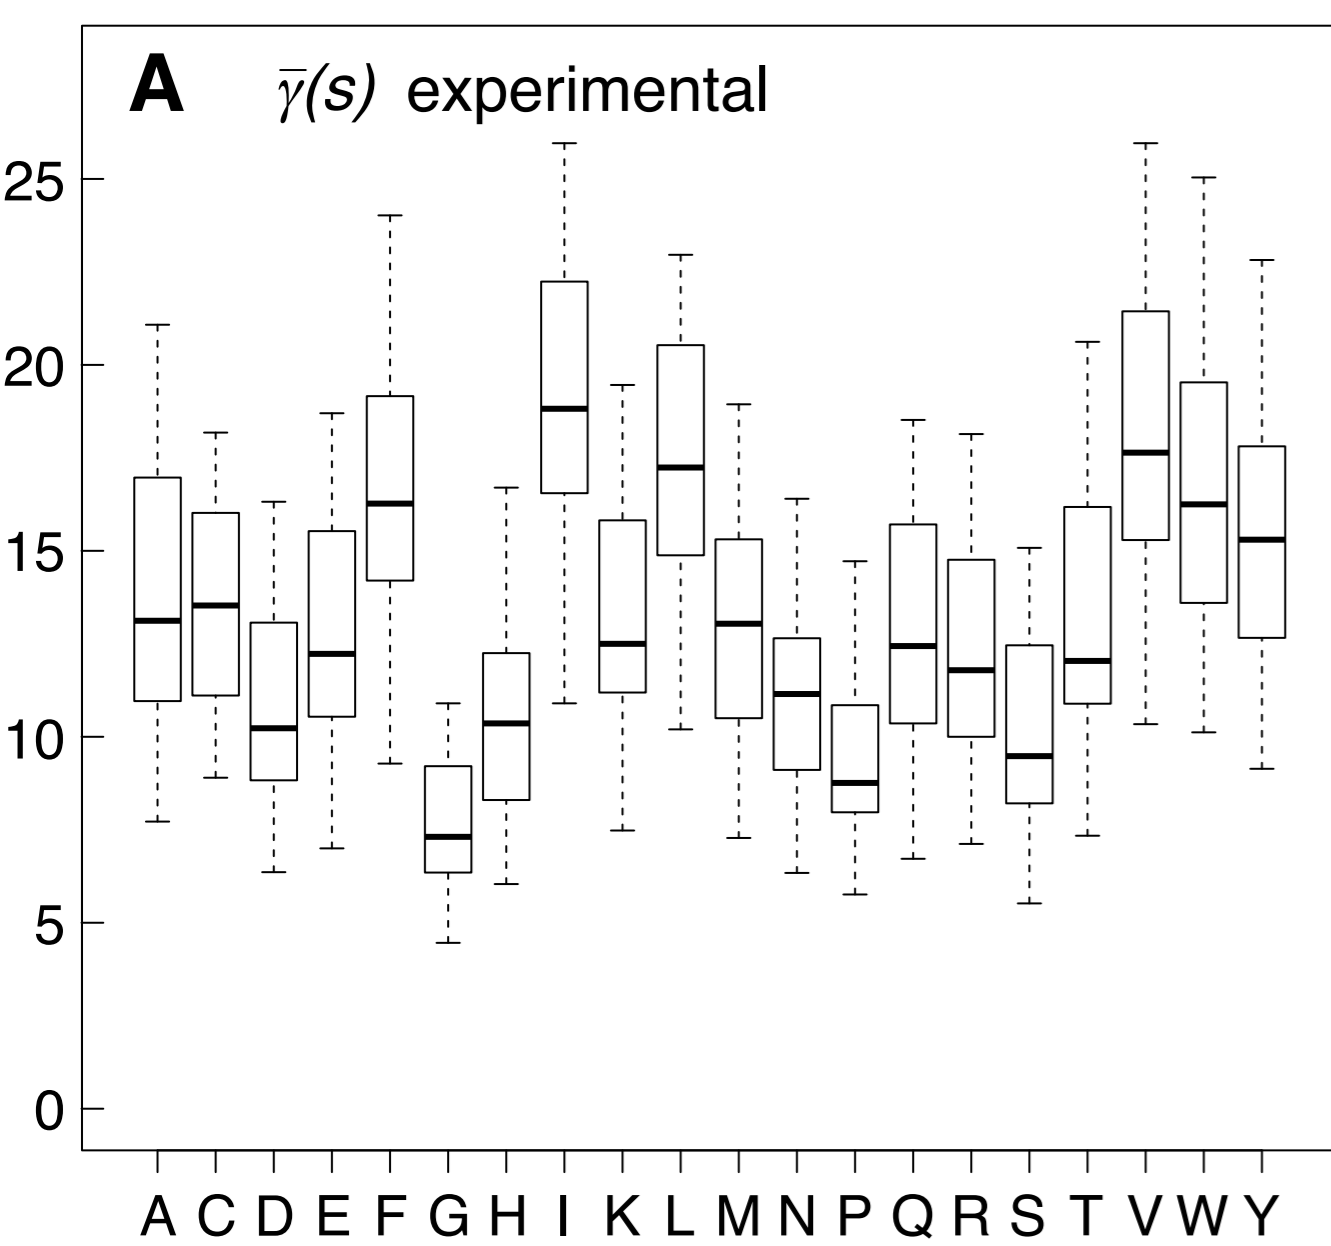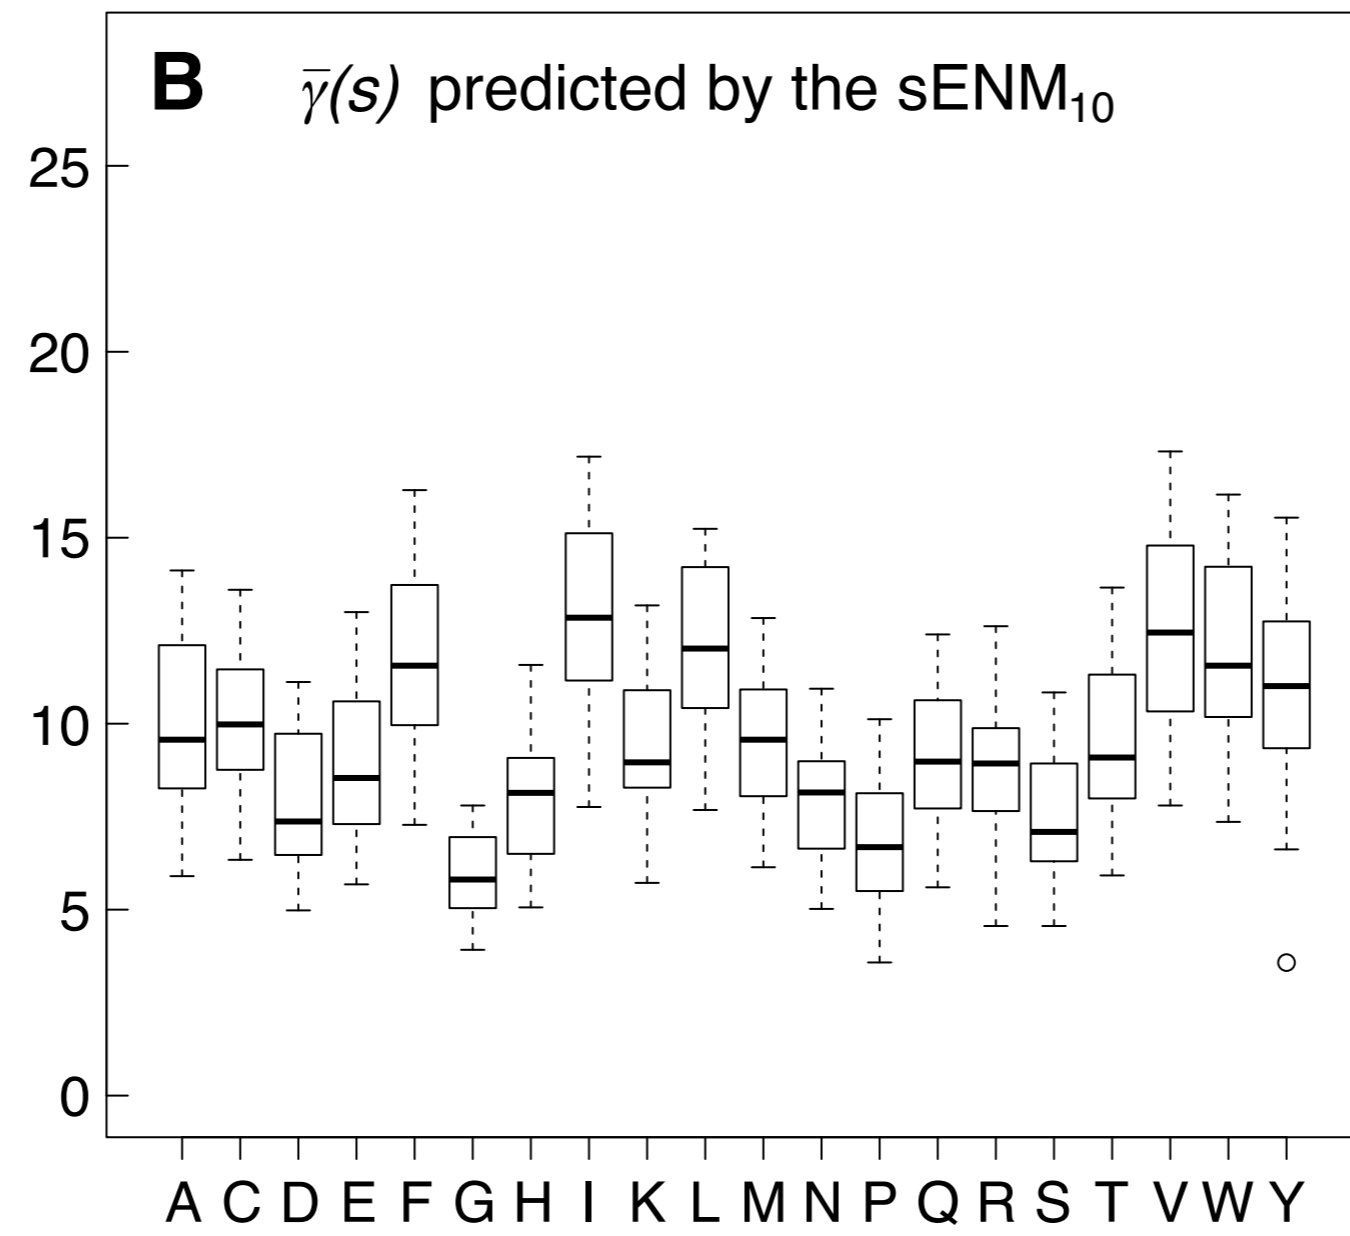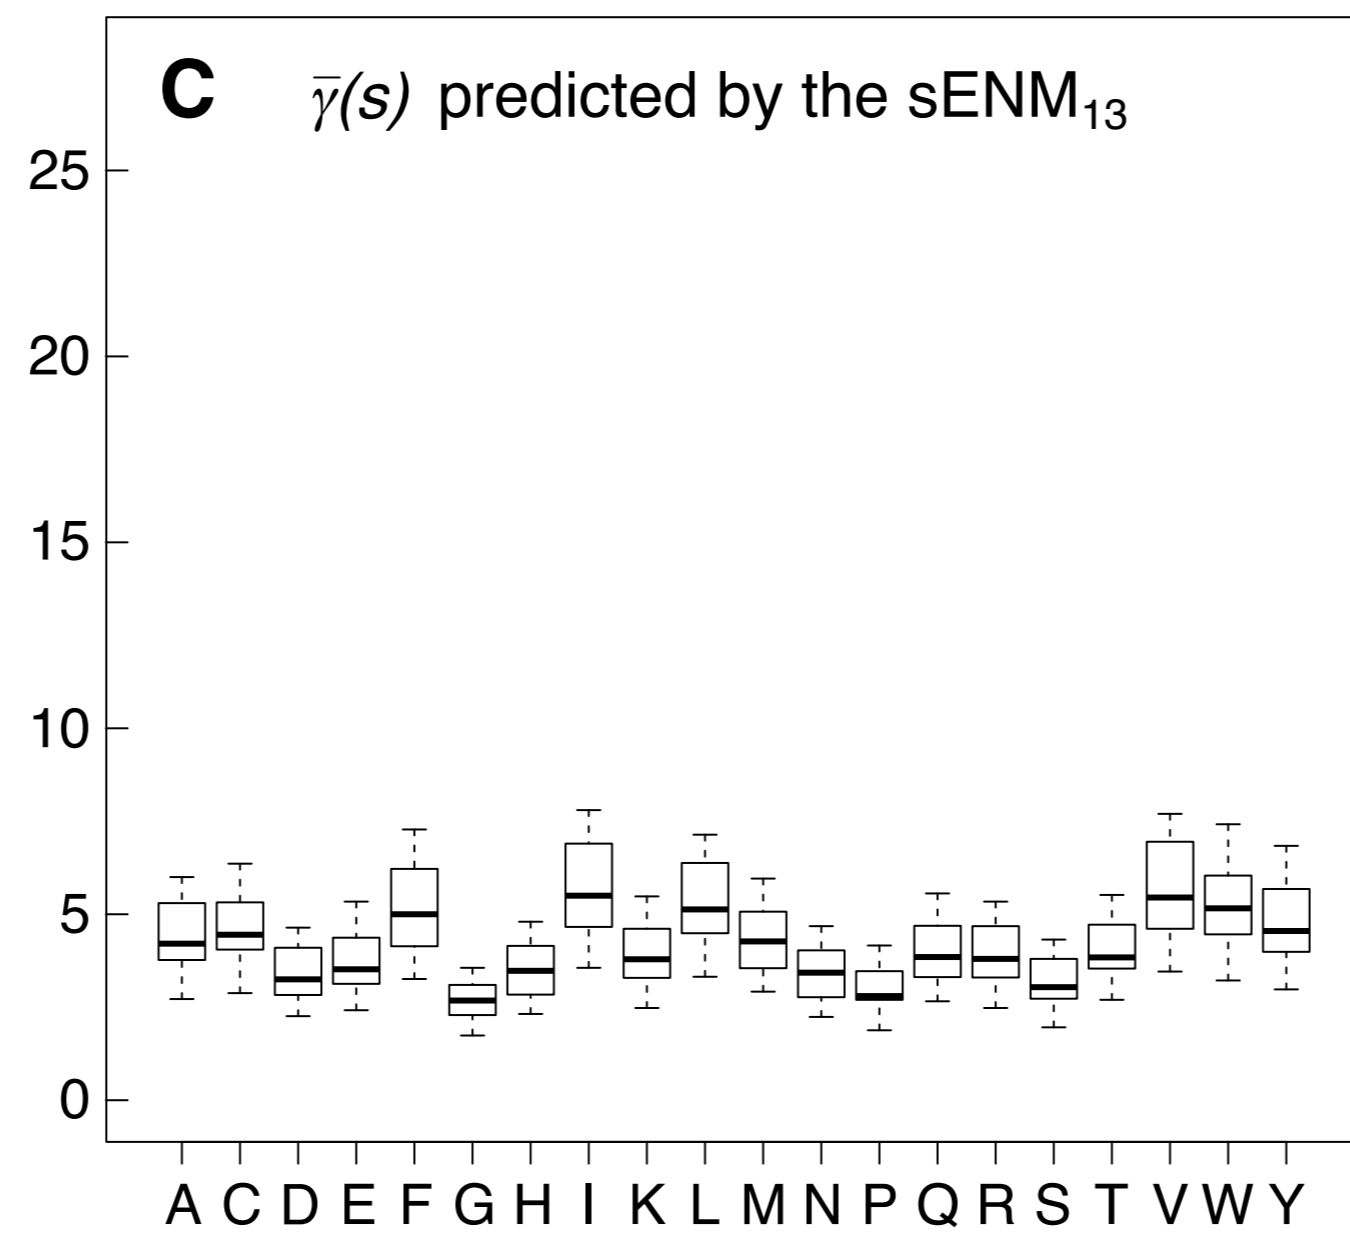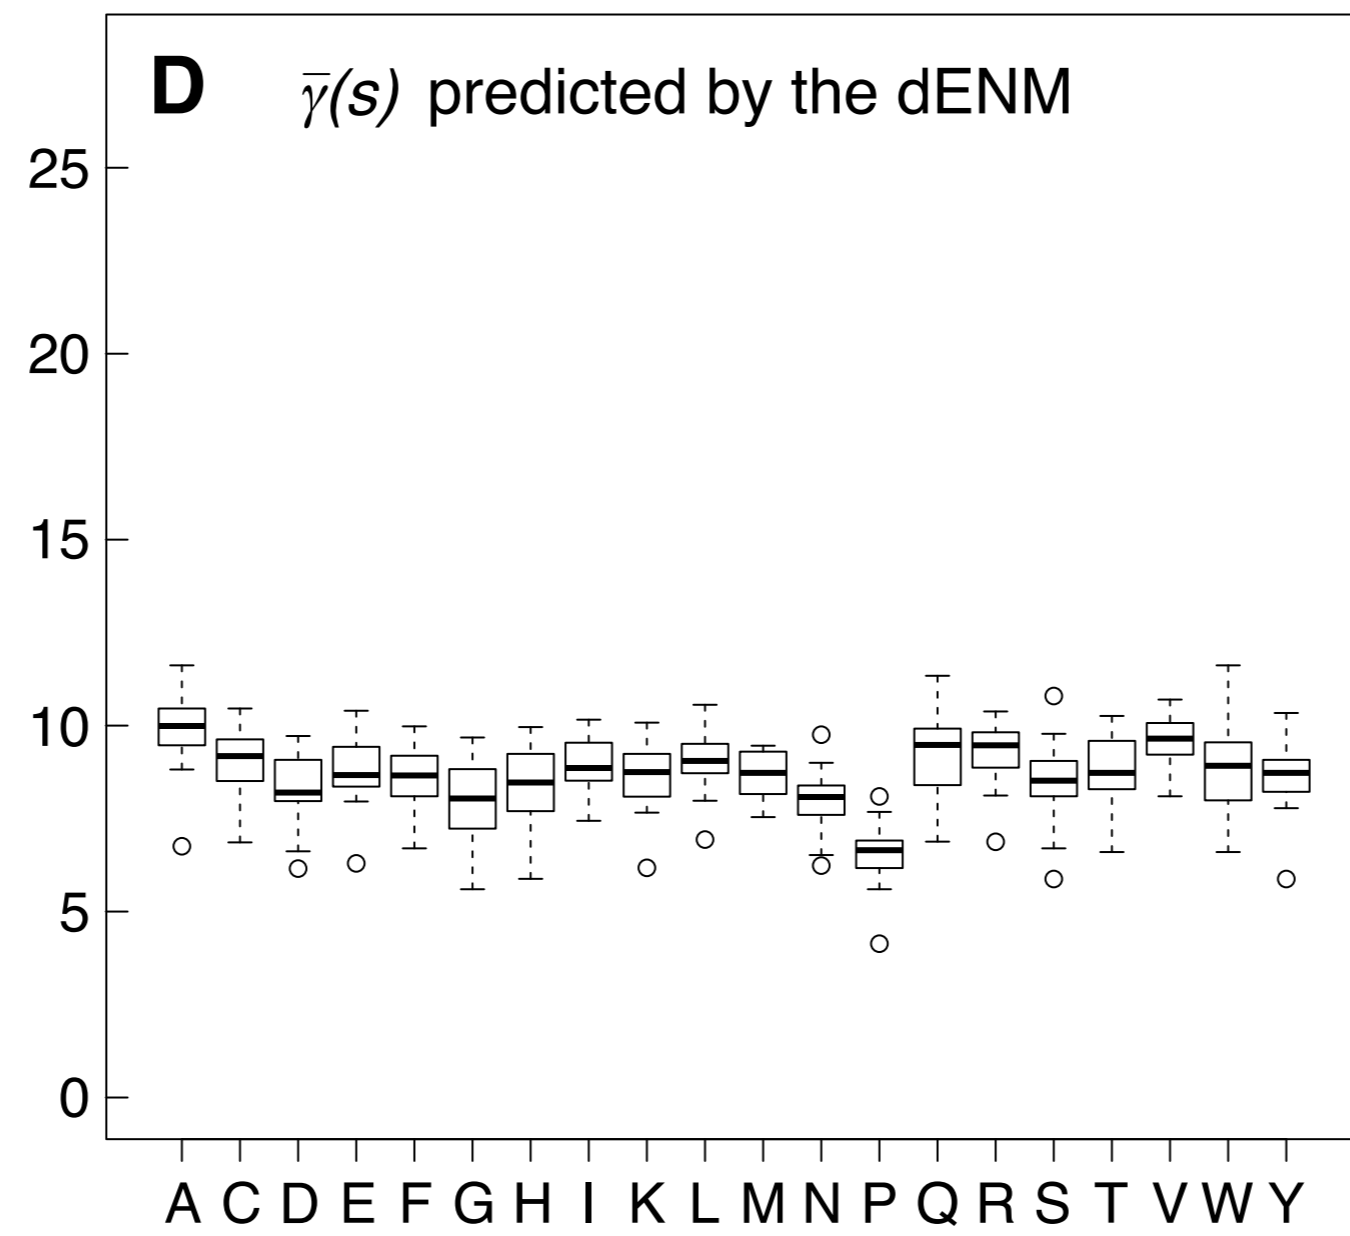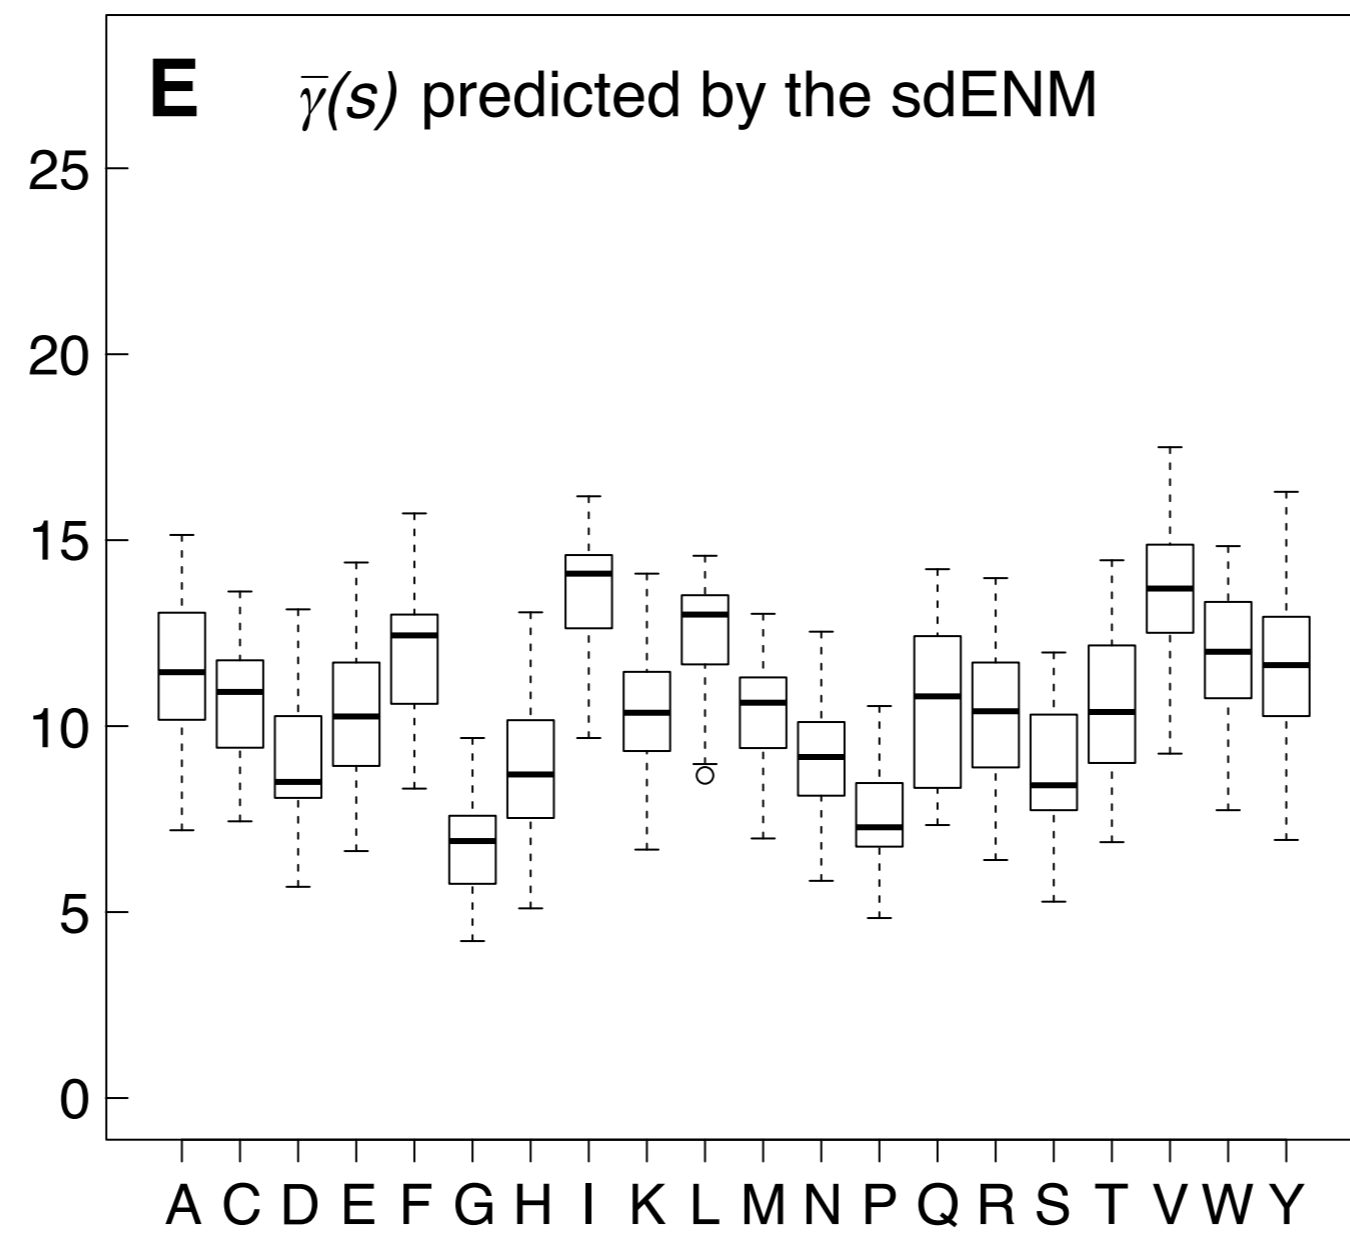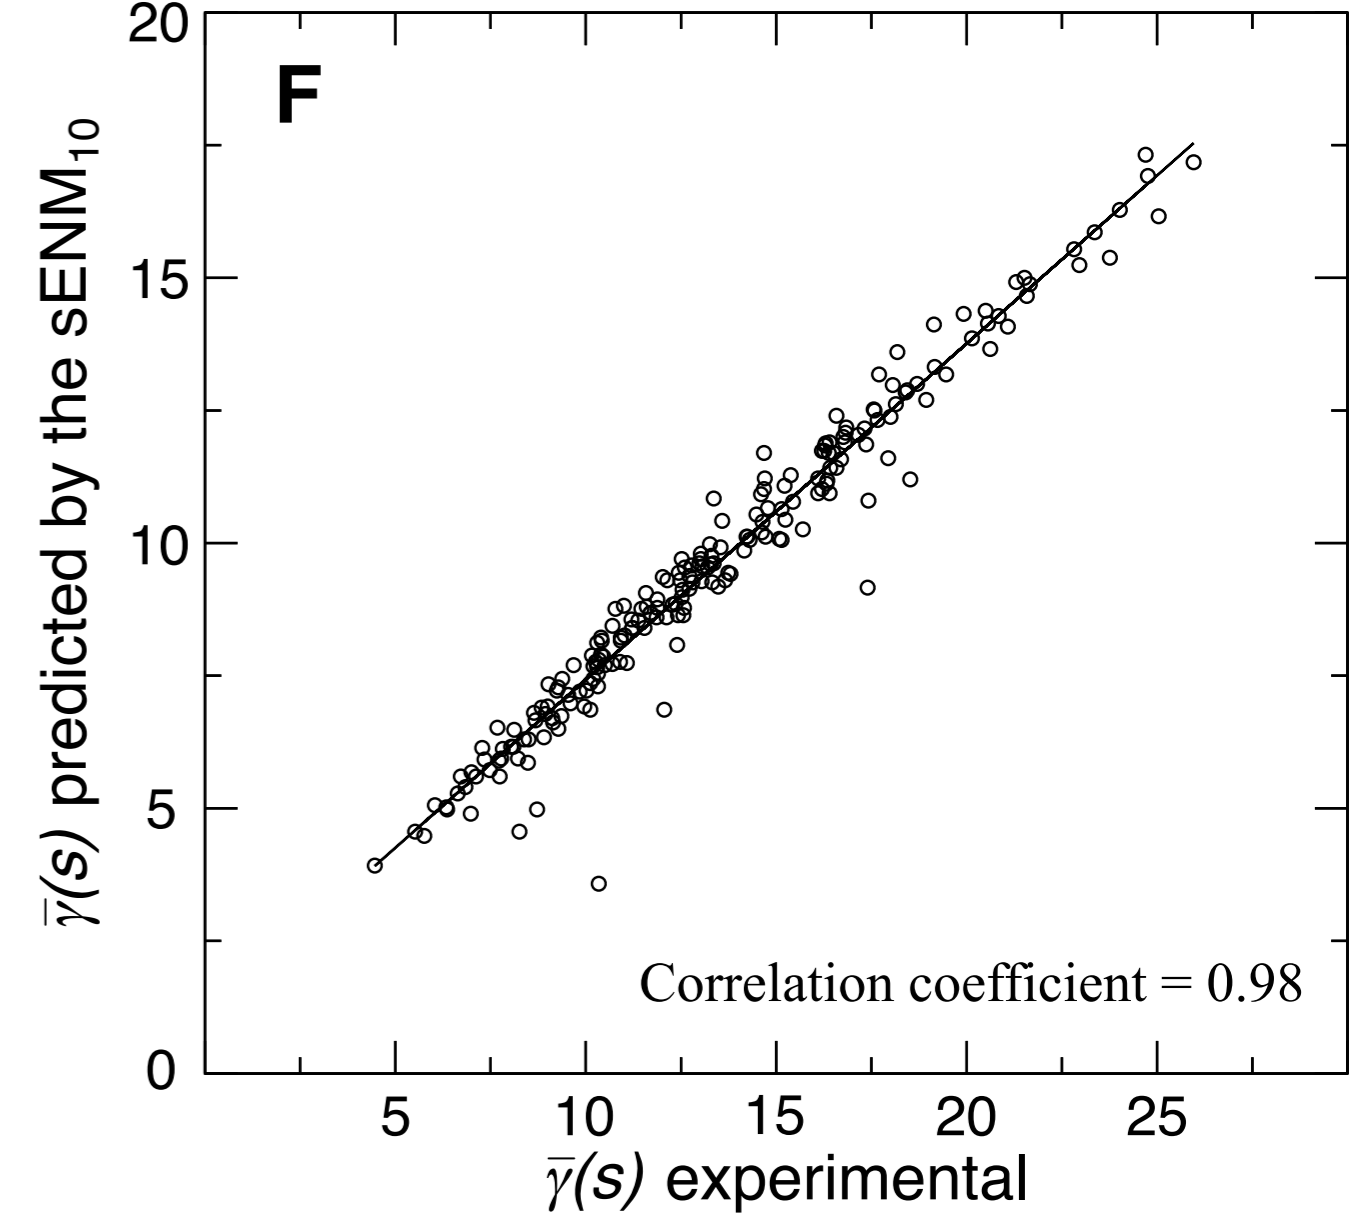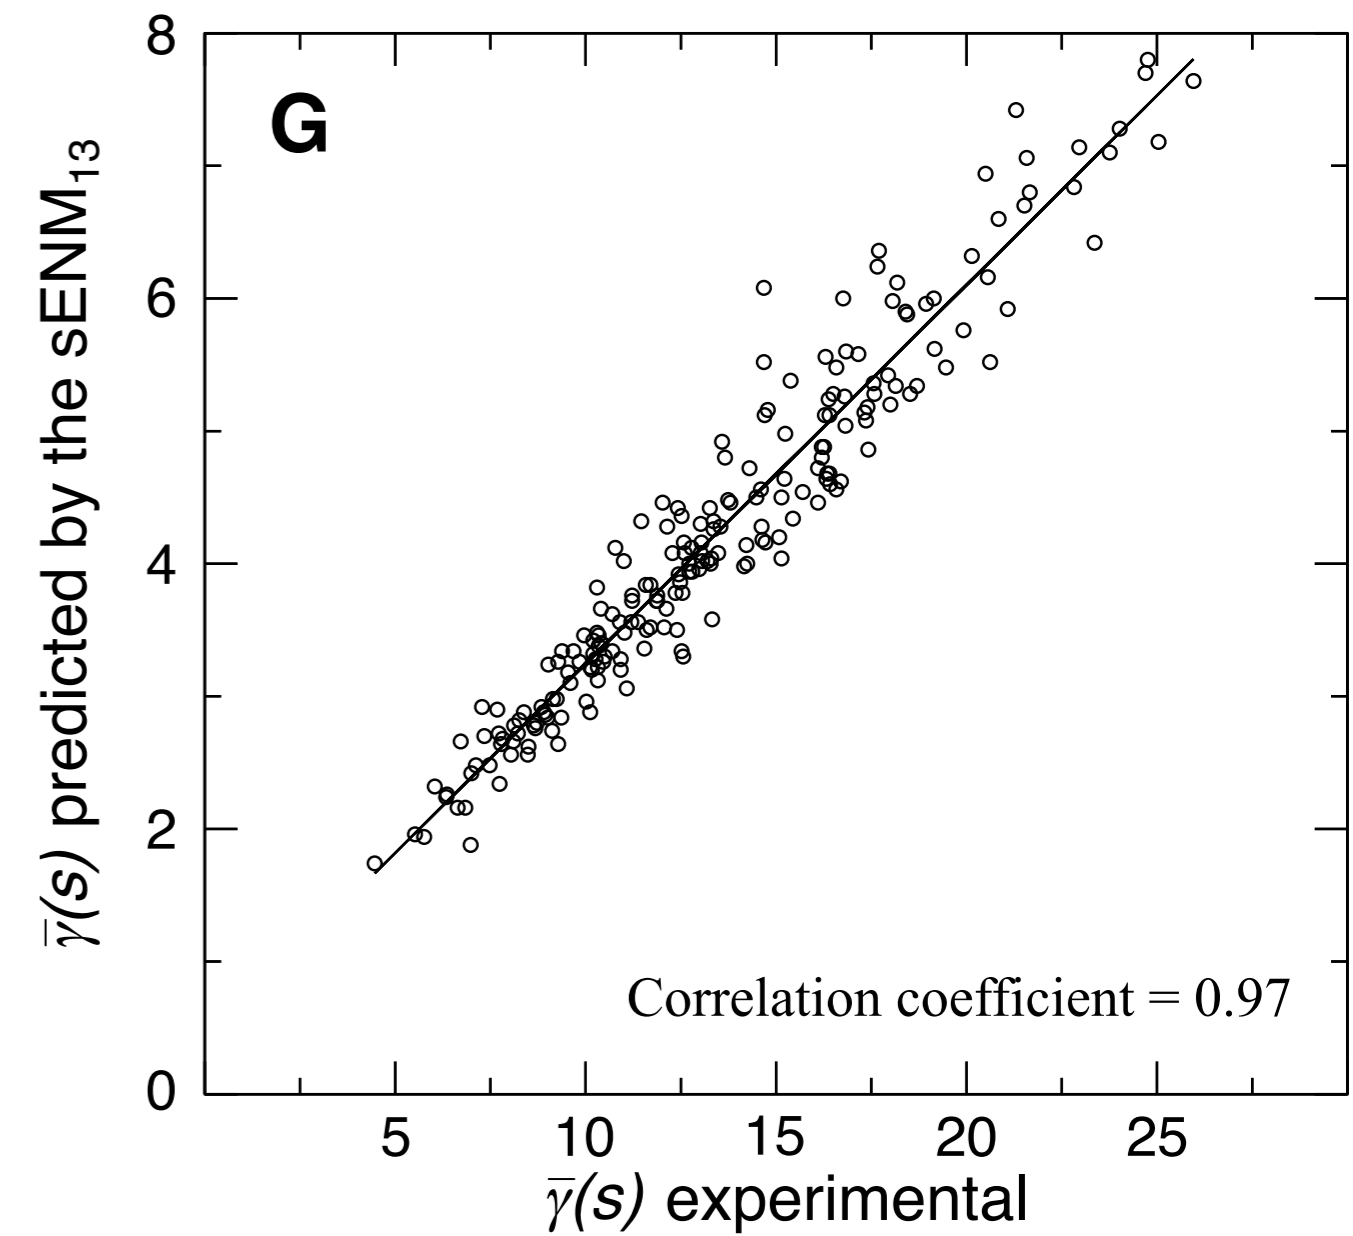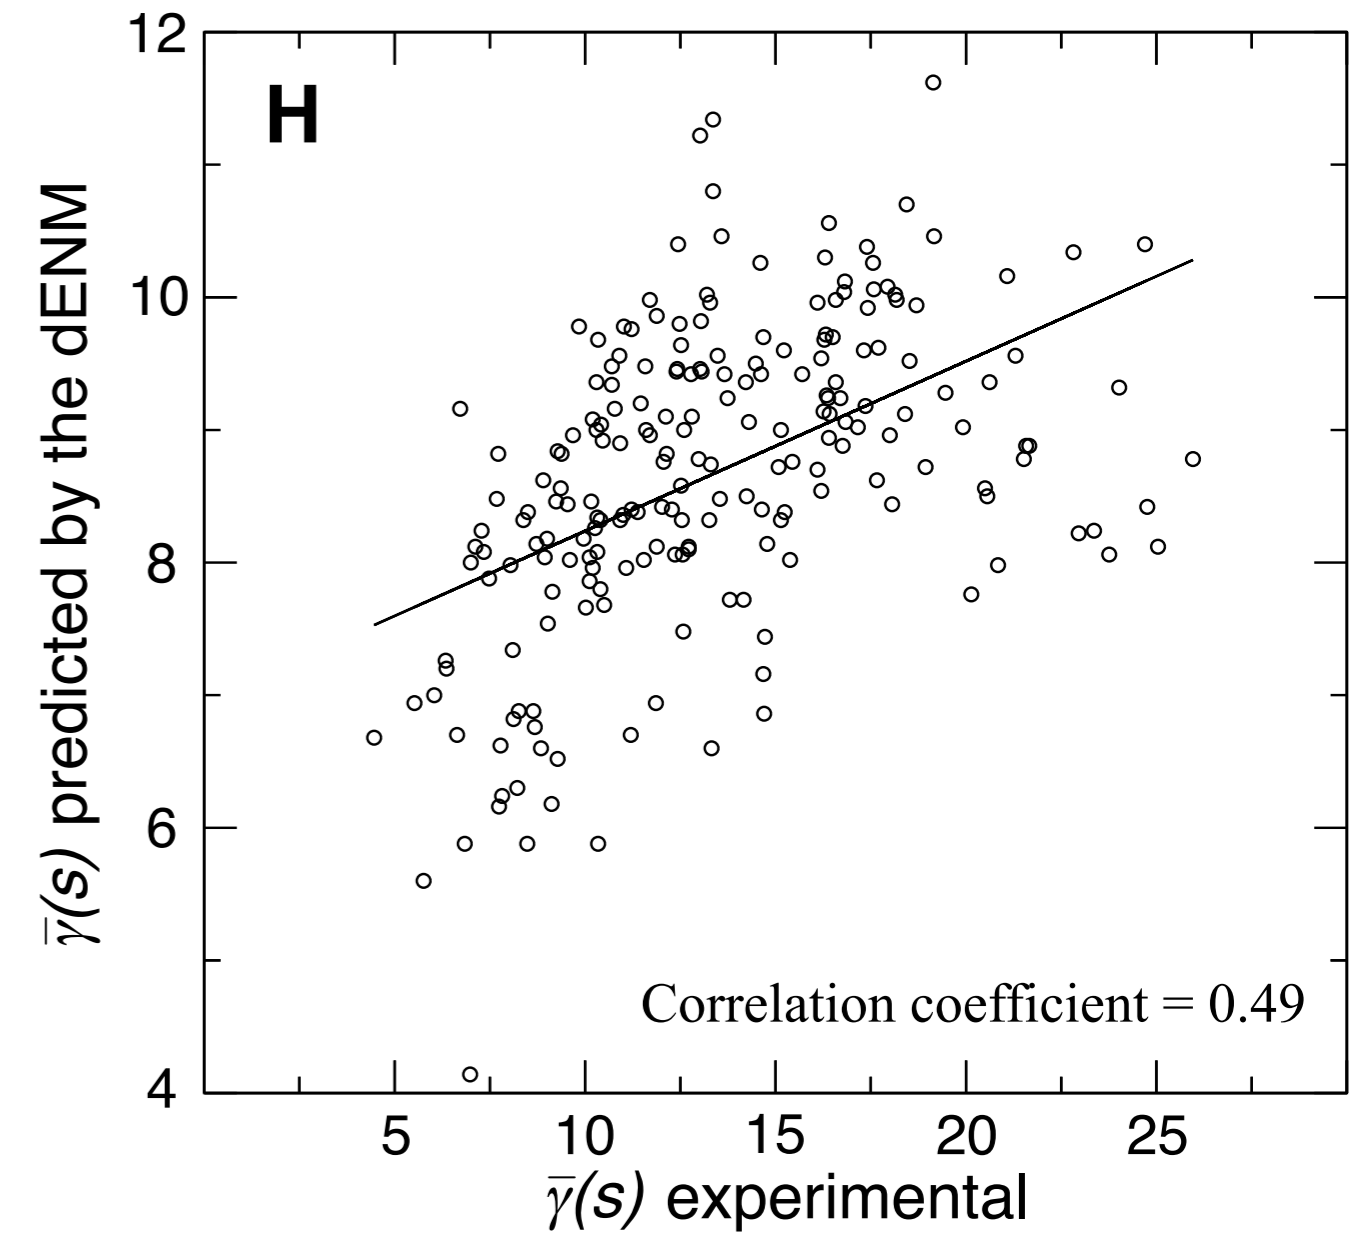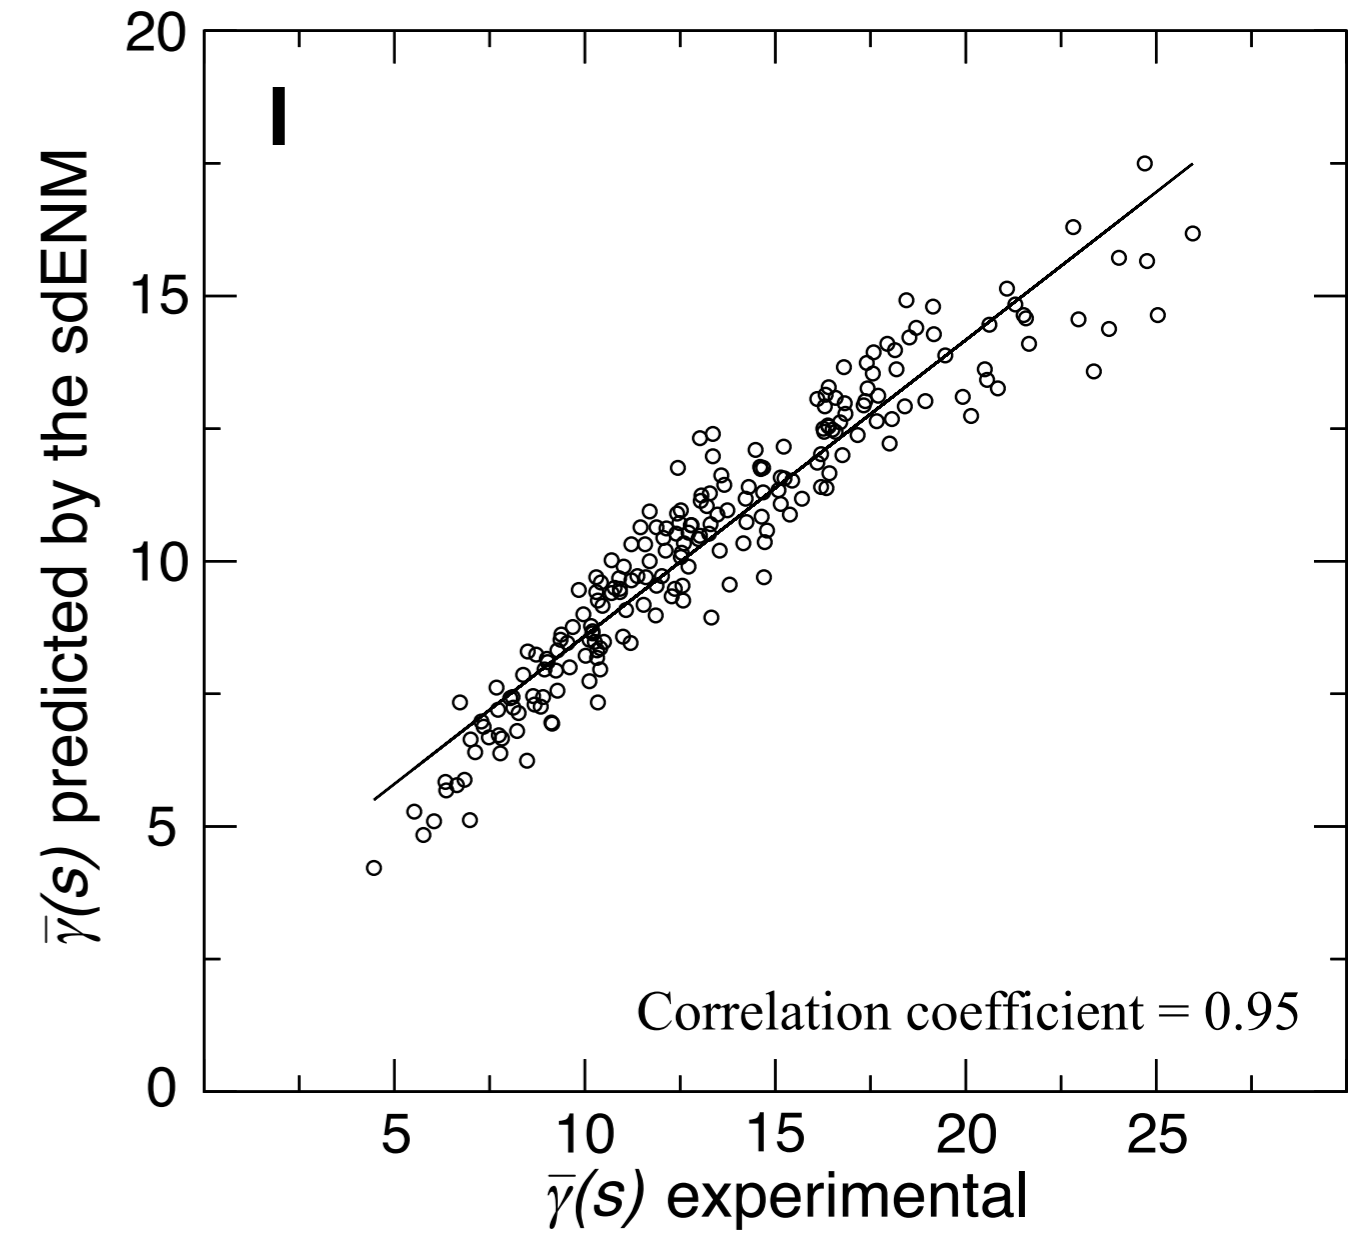

Supplement: pcbi.1003209.s006.pdf [file pcbi.1003209.s006.pdf]
