# Supplementary material for: Effective Harmonic Potentials: Insights into the Internal Cooperativity and Sequence-Specificity of Protein Dynamics
Source: PubMed Central journal article supplement (PMC3757084; doi:10.1371/journal.pcbi.1003209), 2013-08-29
Supplement: pcbi.1003209.s008.pdf [file pcbi.1003209.s008.pdf]

**Supporting Table S1:** Performances of the new ENM during the iterative procedure

| Iteration step | dENM        |                   | sENM <sub>10</sub> |                   | sENM <sub>13</sub> |                   | sdENM       |                   |
|----------------|-------------|-------------------|--------------------|-------------------|--------------------|-------------------|-------------|-------------------|
|                | $r_B$       | $\epsilon_\sigma$ | $r_B$              | $\epsilon_\sigma$ | $r_B$              | $\epsilon_\sigma$ | $r_B$       | $\epsilon_\sigma$ |
| $k = 0$        | 0.67        | 0.92              | 0.63               | 0.56              | 0.66               | 0.64              | 0.69        | 0.54              |
| $k = 1$        | 0.68        | 0.75              | <b>0.63</b>        | <b>0.55</b>       | <b>0.66</b>        | <b>0.63</b>       | 0.70        | 0.51              |
| $k = 2$        | 0.69        | 0.64              | 0.63               | 0.55              | 0.66               | 0.63              | 0.70        | 0.49              |
| $k = 3$        | 0.69        | 0.59              | 0.63               | 0.55              | 0.66               | 0.63              | <b>0.70</b> | <b>0.48</b>       |
| $k = 4$        | 0.69        | 0.56              | 0.63               | 0.54              | 0.66               | 0.62              | 0.70        | 0.47              |
| $k = 5$        | <b>0.69</b> | <b>0.54</b>       | 0.63               | 0.54              | 0.66               | 0.62              | 0.69        | 0.47              |
| $k = 6$        | 0.69        | 0.53              | 0.63               | 0.54              | 0.66               | 0.62              | 0.69        | 0.47              |
| $k = 7$        | 0.69        | 0.52              | 0.63               | 0.54              | 0.65               | 0.62              | 0.69        | 0.47              |
| $k = 8$        | 0.69        | 0.52              | 0.63               | 0.54              | 0.65               | 0.62              | 0.69        | 0.47              |
| $k = 9$        | 0.68        | 0.51              | 0.63               | 0.54              | 0.65               | 0.62              | 0.69        | 0.47              |
