# Supplementary material for: Effective Harmonic Potentials: Insights into the Internal Cooperativity and Sequence-Specificity of Protein Dynamics
Source: PubMed Central journal article supplement (PMC3757084; doi:10.1371/journal.pcbi.1003209), 2013-08-29
Supplement: pcbi.1003209.s009.pdf [file pcbi.1003209.s009.pdf]

**Supporting Table S2:** Spring constants of the dENM

| Interresidue distance $d$ | $\kappa(d)$ |
|---------------------------|-------------|
| [ 0.0 , 4.0 [             | 4.683       |
| [ 4.0 , 4.5 [             | 3.897       |
| [ 4.5 , 5.0 [             | 3.518       |
| [ 5.0 , 5.5 [             | 6.616       |
| [ 5.5 , 6.0 [             | 2.024       |
| [ 6.0 , 6.5 [             | 1.000       |
| [ 6.5 , 7.0 [             | 0.592       |
| [ 7.0 , 7.5 [             | 0.067       |
| [ 7.5 , 8.0 [             | 0.033       |
| [ 8.0 , 8.5 [             | 0.035       |
| [ 8.5 , 9.0 [             | 0.052       |
| [ 9.0 , 9.5 [             | 0.037       |
| [ 9.5 , 10.0 [            | 0.042       |
| [ 10.0 , 10.5 [           | 0.034       |
| [ 10.5 , 11.0 [           | 0.020       |
| [ 11.0 , 11.5 [           | 0.013       |
| [ 11.5 , 12.0 [           | 0.010       |
| [ 12.0 , 12.5 [           | 0.008       |
| [ 12.5 , 13.0 [           | 0.006       |
| [ 13.0 , 13.5 [           | 0.005       |
| [ 13.5 , 14.0 [           | 0.004       |
| [ 14.0 , 14.5 [           | 0.003       |
| [ 14.5 , 15.0 [           | 0.002       |
| [ 15.0 , 15.5 [           | 0.002       |
| [ 15.5 , 16.0 [           | 0.001       |
| [ 16.0 , 16.5 [           | 0.001       |
