# Supplementary material for: Effective Harmonic Potentials: Insights into the Internal Cooperativity and Sequence-Specificity of Protein Dynamics
Source: PLOS journal article supplement (doi:10.1371/journal.pcbi.1003209), 2013-08-29
Supplement: S13 (10.1371/journal.pcbi.1003209.s013) [file journal.pcbi.1003209.s013]

301 Moved Permanently

# Moved Permanently

The document has moved here.

---

Apache Server at www.ploscompbiol.org Port 80
