# Supplementary material for: Effective Harmonic Potentials: Insights into the Internal Cooperativity and Sequence-Specificity of Protein Dynamics
Source: PLoS Comput Biol. 2013 Aug 29;9(8):e1003209. doi: 10.1371/journal.pcbi.1003209 (PMC3757084; doi:10.1371/journal.pcbi.1003209)
Supplement: Table S4 — Spring constants of the . (PDF) [file pcbi.1003209.s011.pdf]

**Supplementary Table S4:** Spring constants of the sENM<sub>13</sub>

[illegible]
